# Supplementary material for: Protein fibrillation and hybridization with polysaccharides enhance strength, toughness, and gas selectivity of bioplastic packaging
Source: Royal Society of Chemistry journal article supplement (doi:10.1039/d3ta00446e), 2023-01-01
Supplement: d3ta00446e1.pdf [file d3ta00446e1.pdf]

1     **Protein fibrillation and hybridization with polysaccharides enhance strength,**  
2                    **toughness, and gas selectivity of bioplastic packaging**

3                    Yeyang Zhang<sup>a,‡</sup>, Yingqun Nian<sup>ab,‡</sup>, Qixin Shi<sup>a</sup>, Bing Hu<sup>a,\*</sup>

4  
5     <sup>a</sup>College of Food Science and Technology, Nanjing Agricultural University, Nanjing  
6     210095, P.R. China

7  
8     <sup>b</sup>Key Laboratory of Meat Processing and Quality Control, MOE, Key Laboratory of  
9     Meat Processing, MOA, Jiangsu Synergetic Innovation Center of Meat Processing and  
10    Quality Control, Nanjing Agricultural University, Nanjing 210095, P. R. China

11  
12    E-mail: [hubing212002@njau.edu.cn](mailto:hubing212002@njau.edu.cn);

13  
14    <sup>‡</sup> Equal contribution

15

16

17

18

19

20

21

22

23

24

25

26

27

28

29

30

31

32

33

34

35

36

37

38

39

40

41

42

43

44

45

46

47

48

49

50

51

52

53

54

55

56

57

58

59

60

61

62

63

64

65

66

67

68

69

70

71

72

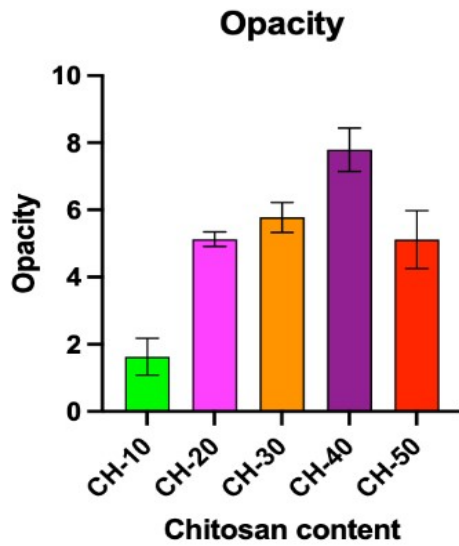

**Fig. S1.** The opacity measured at 550 nm of the bioplastic films composed with soybean protein isolate (SPI) and different contents of chitosan (CH) from 10% to 50%.

73  
74  
75  
76  
77  
78  
79  
80  
81  
82  
83  
84  
85  
86  
87  
88  
89  
90  
91  
92  
93  
94  
95  
96  
97  
98  
99  
100  
101  
102  
103  
104  
105  
106  
107  
108  
109  
110  
111  
112  
113  
114  
115  
116

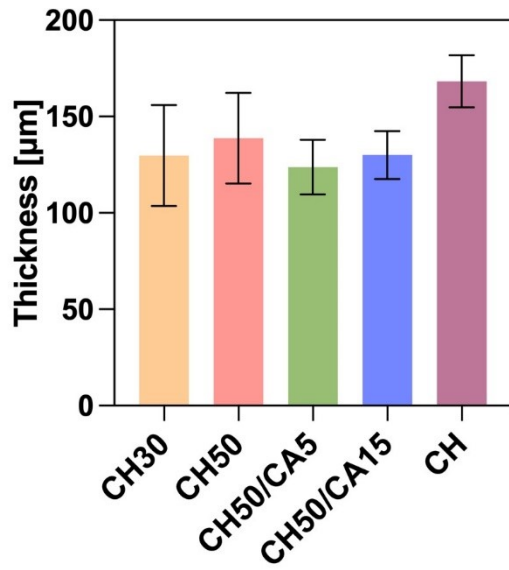

**Fig. S2.** Thickness of the SPI-chitosan hybrid biplastic films and the chitosan film for measurement of gas permeability.

117  
118  
119  
120  
121  
122  
123  
124  
125  
126  
127  
128  
129  
130  
131  
132  
133  
134  
135  
136  
137  
138  
139  
140  
141  
142  
143  
144  
145  
146  
147  
148  
149  
150  
151  
152  
153  
154  
155  
156  
157  
158  
159  
160

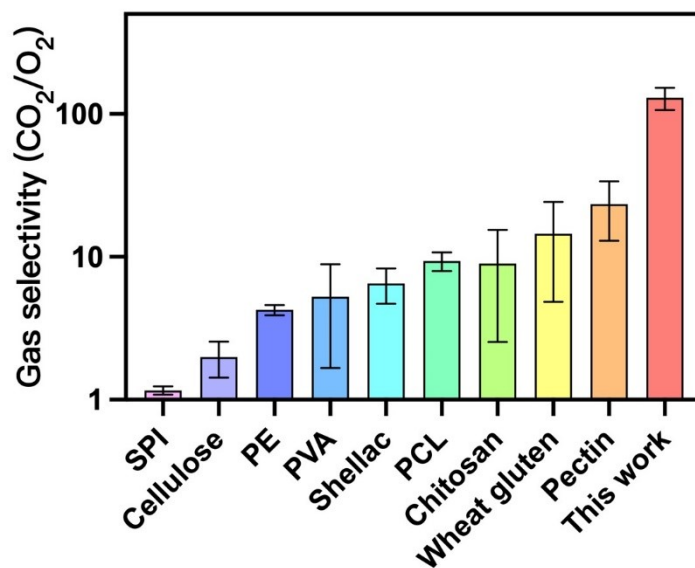

**Fig. S3.** The CO<sub>2</sub>/O<sub>2</sub> selectivity of the bioplastic films prepared by soybean protein isolate (SPI)<sup>1</sup>, cellulose<sup>2</sup>, polyethylene (PE)<sup>3</sup>, polyvinyl alcohol (PVA)<sup>4</sup>, shellac<sup>5</sup>, polycaprolactone(PCL)<sup>3</sup>, chitosan<sup>6,7,8,9</sup>, wheat gluten<sup>7</sup> and pectin<sup>7,10</sup> in previous other studies.

161  
162  
163  
164  
165  
166  
167  
168  
169  
170  
171  
172  
173  
174  
175  
176  
177  
178  
179  
180  
181  
182  
183  
184  
185  
186  
187  
188  
189  
190  
191  
192  
193  
194  
195  
196  
197  
198  
199  
200  
201  
202  
203  
204

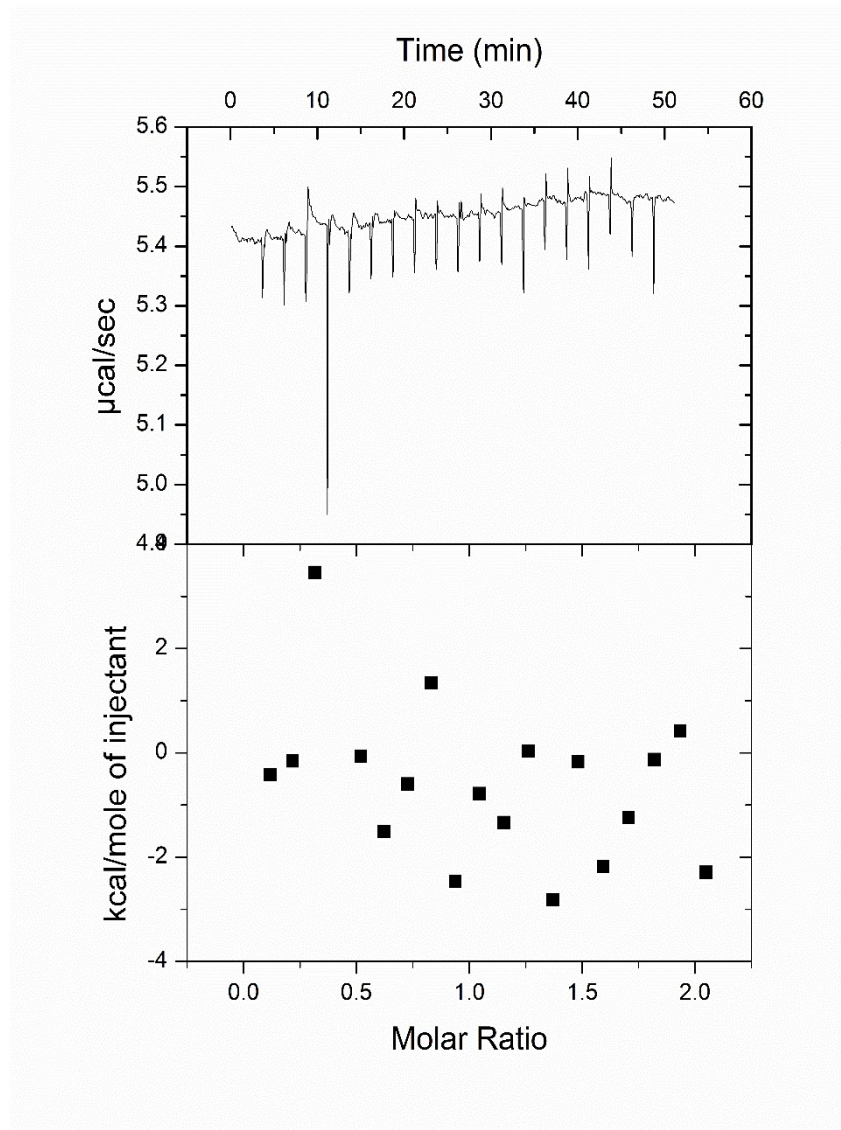

**Fig. S4.** Isothermal titration calorimetry (ITC) results for the interaction between the chitosan sample and the soybean protein isolate sample heated at acidic environment.

205  
206  
207  
208  
209  
210  
211  
212  
213  
214  
215  
216  
217  
218  
219  
220  
221  
222  
223  
224  
225  
226  
227  
228  
229  
230  
231  
232  
233  
234  
235  
236  
237  
238  
239  
240  
241  
242  
243  
244  
245  
246  
247  
248

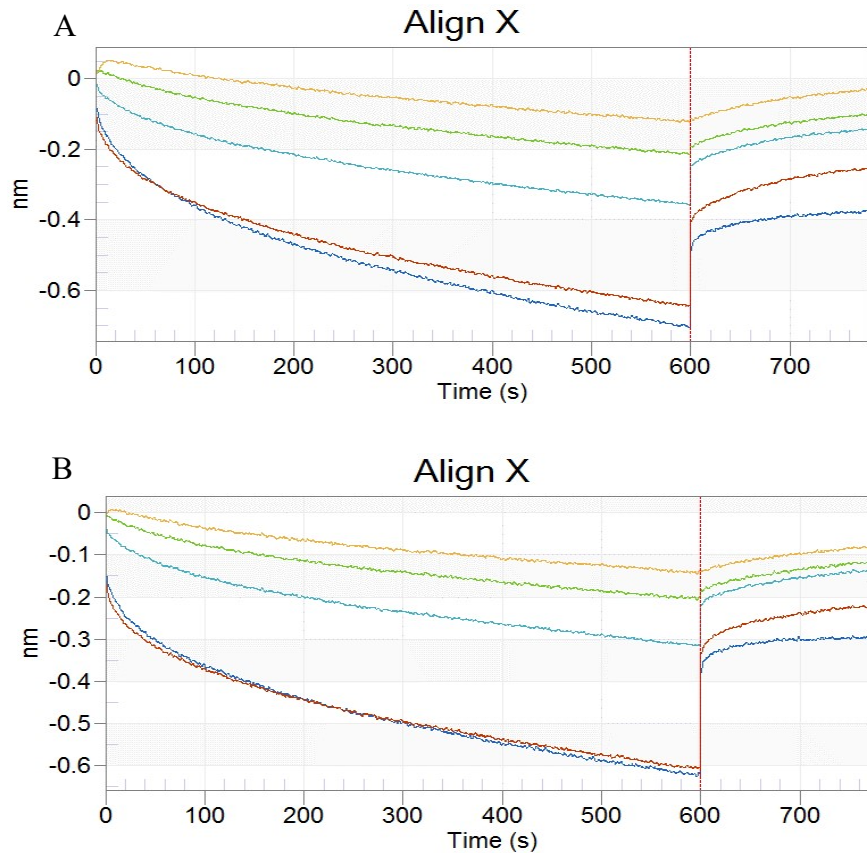

**Fig. S5.** Measurement of affinity of chitosan to the sensor chip coated with (A) or without (B) the soybean protein isolate samples which were heated in the acidic environment.

249  
250  
251  
252  
253  
254  
255  
256  
257  
258  
259  
260  
261  
262  
263  
264  
265  
266  
267  
268  
269  
270  
271  
272  
273  
274  
275  
276  
277  
278  
279  
280  
281  
282  
283  
284  
285  
286  
287  
288  
289  
290  
291  
292

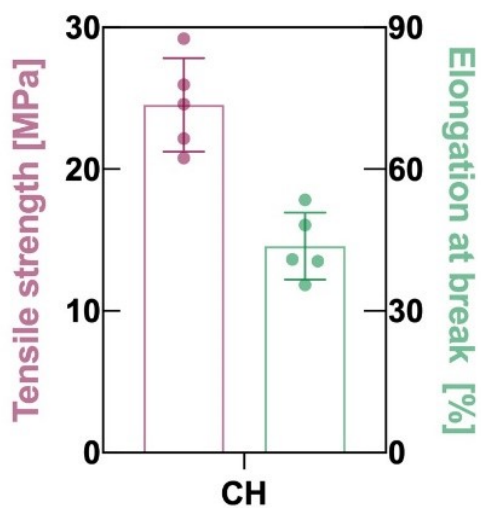

**Fig. S6.** Mechanical properties of the tensile strength and elongation at break of the bioplastic films prepared with chitosan.

293

294

295

296

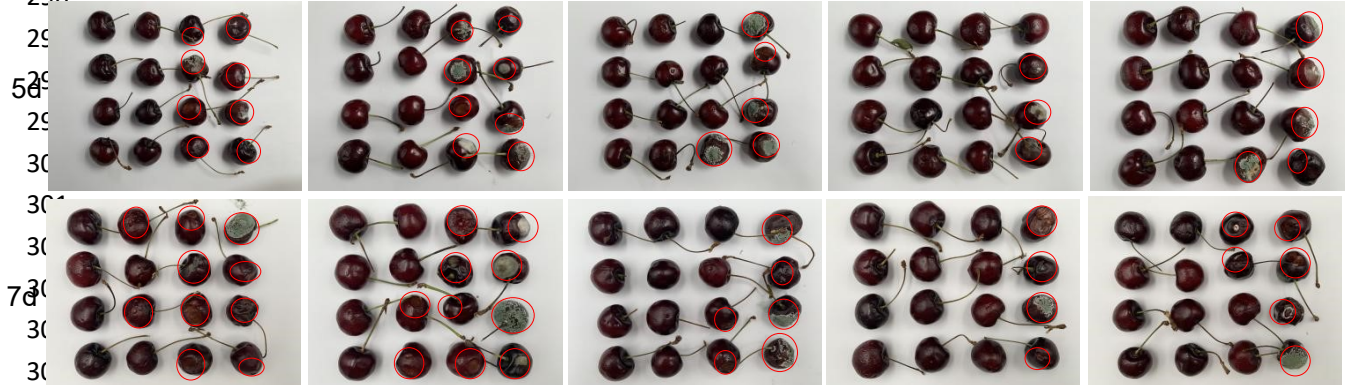

306

307

308

309

310

311

312

313

314

315

316

317

318

319

320

321

322

323

324

325

326

327

328

329

330

331

332

333

334

335

336

337

338

339

340

341

342

343

344

345

346

347

348

349

350

C

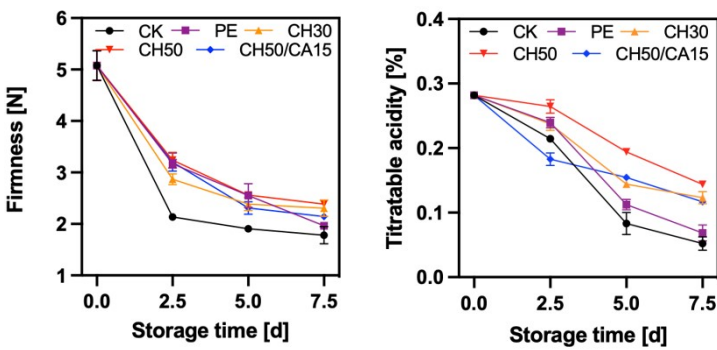

310

317 Fig. S7. The hybrid bioplastic films as a passively modified atmosphere packaging of  
318 cherry. (A) Photographs of ambient (CK) and packaged cherries by polyethylene films  
319 (PE), the bioplastic films composed with soybean protein isolate (SPI) and chitosan  
320 (CH) with different contents of 30 % (CH30), 50 % (CH50) and the one crosslinked by  
321 15 % citric acid (CH50/CA15) after 5 and 7 days of storage at room temperature. The  
322 firmness (B), titratable acidity (C) of cherry in different treatment groups during  
323 storage.

324

325

326

327

328

329

330

331

332

333

334

335

336

337

338

339

340

341

342



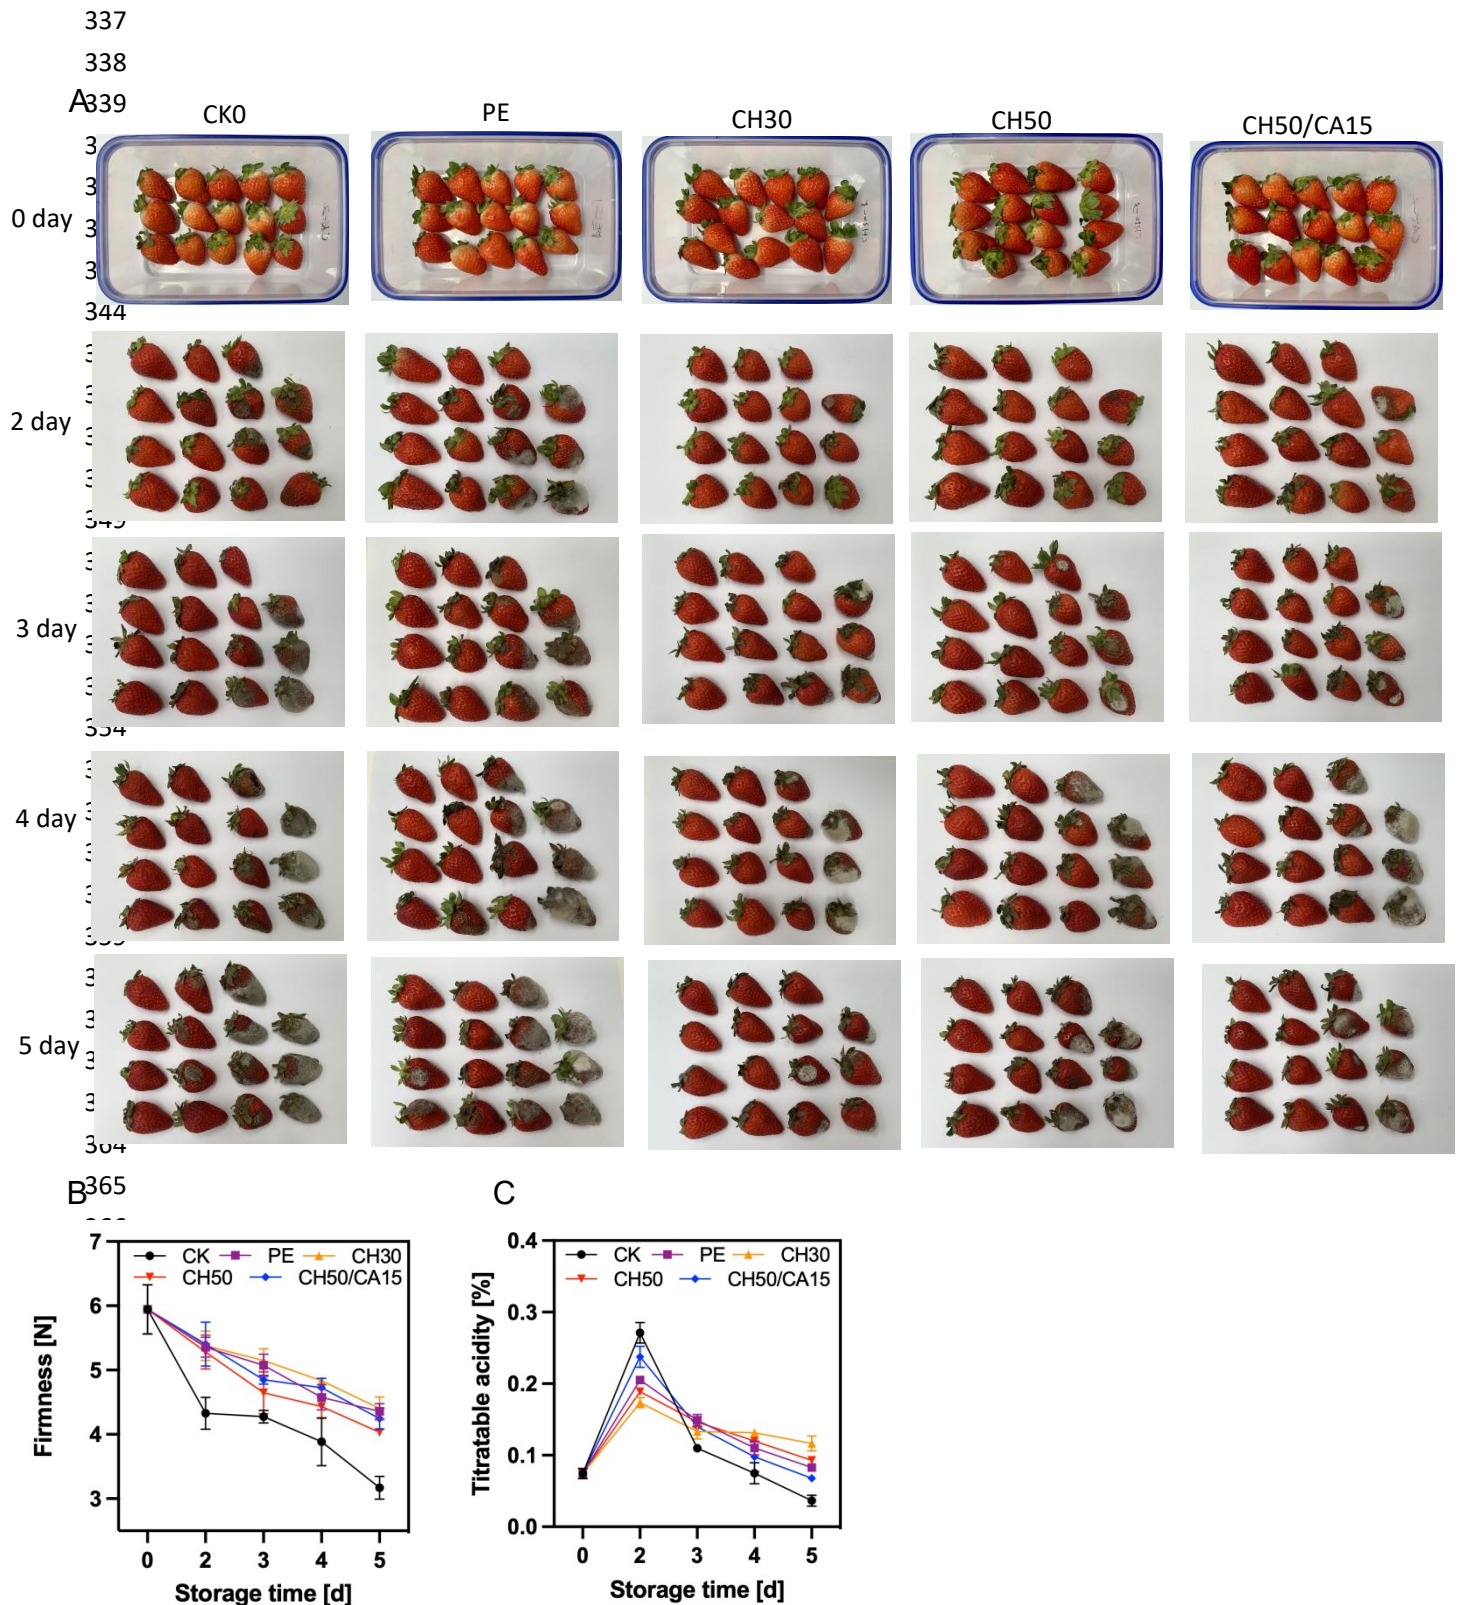

381 chitosan (CH) with different contents of 30 % (CH30), 50 % (CH50) and the one  
382 crosslinked by 15 % citric acid (CH50/CA15) on 0, 2, 3, 4 and 5 days of storage at room  
383 temperature. The firmness (B), titratable acidity (C) of strawberry in different treatment  
384 groups during storage.

385

386

387 **Methods for characterization of the interactions between the SPI sample and the**  
388 **chitosan sample during the thermal acidic treatment.**

389 *Isothermal titration calorimetry (ITC).* ITC was performed on a MicroCal iTC200  
390 (MicroCal Inc., England). The diluted SPI sample (20  $\mu$ M) after the thermal acidic  
391 treatment was maintained in the sample cell. Chitosan (200  $\mu$ M) was kept in a PCR  
392 tube and introduced into the sample cell through injection by syringes. Both of the SPI  
393 sample and the chitosan sample were prepared in 0.8% acetic acid solution. The  
394 temperature was set at 25 °C in “Instrument Controls”.

395 *Fortebio Octet system measurement.* Binding kinetics between the chitosan  
396 sample and the SPI sample after the thermal acidic treatment were measured using the  
397 ForteBio Octet RED96 system (ForteBio) according to the operating manual.  
398 Biotinylation and desalination of the SPI samples were conducted as described in our  
399 previous study<sup>11</sup>. The pH 6 working solution was prepared by mixing 1% acetic acid  
400 solution and Bis-tris buffer. The desalted protein solution was diluted to 0.025 wt%  
401 using the above working solution. SA sensors coated with the SPI sample were  
402 transferred to different concentrations of chitosan solutions (dissolved in 1% acetic  
403 acid) such as 0.1 mg/mL, 0.05 mg/mL, 0.025 mg/mL, 0.0125 mg/mL and 0.00625  
404 mg/mL, and then the sensors were transferred to the working solution to exclude non-  
405 specific binding. Chitosan solutions with different concentration gradients as described

406 above were directly bound to the SA sensor and dissociated to observe the signal ratio.

407

#### 408 **The methods utilized in the wrapping preservation of beef by the bioplastic films**

409 The TVC measurement was performed for microbiological analysis based on the  
410 method reported in previous study<sup>12</sup>. Briefly, a minced beef sample (25 g) was mixed  
411 with 225 mL sterile normal saline in a sterile conical flask and homogenized for 1-2  
412 min. Serial dilutions (1:10 v/v each time) were made, which was then used for spread  
413 plate technique on standard plate count agar (PCA). TVC was determined after 48 h  
414 incubation at 37 °C. TVC values were expressed as CFU/g meat. All the tests were  
415 carried out in triplicate per sample.

416 The total TVB-N was detected referring to the method reported in previous study  
417 with some modifications<sup>13</sup>. Briefly, a minced beef sample (10 g) was added to 100 mL  
418 distilled water in a conical flask. The conical flask was mixed by gently shaking for 30  
419 min to obtain a homogeneous solution. The solution was filtered and then 5 mL filtrate  
420 was alkalized by adding 5 mL of MgO solution (10 g/L). Afterwards, the mixture  
421 solution was determined to obtain the value of TVB-N by an Automatic Kjeldahl  
422 Analyzer (Hanon, China). TVB-N values were expressed as mg/100 g meat and all tests  
423 were carried out as triplicates per sample.

424 The pH of beef samples was determined by using 35634-40 PHSPEAR pH meter  
425 (OAKTON Co., Ltd, USA), which was firstly calibrated using standard buffer solutions  
426 (pH 4.0 and pH 7.0). Then the pH probe was rinsed with pure water and inserted into  
427 the beef sample to make the electrode fully contacted with the sample muscle tissue.  
428 Each sample was measured at three different points in the beef and the results were

429 averaged.

430 Lipid oxidation was measured by thiobarbituric acid reactive substances (TBARS).  
431 In brief, 5 g of minced beef was mixed with 50 mL trichloroacetic acid solution (7.5%  
432 trichloroacetic acid and 0.1% ethylenediaminetetraacetic acid) in a conical flask and  
433 the flask was shaken at 50 °C and the speed of 160 r/min in the thermostatic oscillator  
434 for 30 min. After cooling to the room temperature, the mixture was filtered using  
435 Whatman No.1 filter paper. Then 5 mL of filtrate and 5 mL of 20 mM 2-thiobarbituric  
436 acid (TBA) were mixed and incubated in a 90 °C water bath for 90 min. After that, the  
437 mixture was cooled to room temperature with water. The absorbance of the solution  
438 was determined at 532 nm with microplate reader (Thermo Fisher Scientific, USA). A  
439 standard curve was prepared using 1, 1, 3, 3- tetramethoxypropane and the TBARS  
440 values were expressed as mg of MDA equivalent per kg of meat. All the experiments  
441 were repeated in triplicate.

442 Color was measured directly on beef sample surface by Minolta colorimeter CR  
443 400 (Minolta, Japan) with a D65, 10° illumination and an 8 mm aperture. White board  
444 calibration and background were used for standardization before test. Sample readings  
445 were taken at five different locations on each muscle and averaged. The L\* (Lightness,  
446 black-white), a\* (Redness, + to - from red to green), b\* (Yellowness, + to - from  
447 yellow to blue).

448

449

450 **REFERENCES**

- 452 1. Z. Wang, X. X. Wang, J. Zhou, Z. S. Ma, *Adv. Mater. Res.* **2013**, 666, 17–22.
- 453 2. B. Sun, W. Wang, M. Zhang, M. Sain, *Cellulose* **2018**, 25, 5919–5937.
- 454 3. X. Yun, Y. Wang, M. T. Li, Y. Jin, Y. M. Han, T. Dong, *J. Food Process. Preserv.*  
455 **2017**, 41, e13247.
- 456 4. L. X. Lu, Z. Wan, W. Q. Lu, L. Pan, C. Ge, *Polym. Compos.* **2019**, 40, 1061–1067.
- 457 5. Z. Zhou, J. J. Ma, K. Li, W. W. Zhang, K. Li, X. H. Tu, L. X. Liu, J. Xu, H. Zhang,  
458 *ACS Nano* **2021**, 15, 8742–8752.
- 459 6. O. B. G. Assis, J. H. Hotchkiss, *Packag. Technol. Sci.* **2007**, 20, 293–297.
- 460 7. N. Gontard, R. Thibault, B. Cuq, S. Guilbert, *J. Agric. Food Chem.* **1996**, 44, 1064–  
461 1069.
- 462 8. A. I. Bourbon, A. C. Pinheiro, M. A. Cerqueira, C. M. R. Rocha, M. C. Avides, M.  
463 A. C. Quintas, A. A. Vicente, *J. Food Eng.* **2011**, 106, 111–118.
- 464 9. X. Zhang, H. Lian, J. Shi, W. Meng, Y. Peng, *Int. J. Biol. Macromol.* **2020**, 148,  
465 1242–1250.
- 466 10. S. C. Fraga, M. A. Azevedo, I. M. Coelho, C. Brazinha, J. G. Crespo, *Sep. Purif.*  
467 *Technol.* **2018**, 197, 18–26.
- 468 11. X. Wang, Y. Nian, Z. Zhang, Q. Chen, X. Zeng, B. Hu, *Colloids Surf. B*  
469 *Biointerfaces* **2019**, 183, 110459.
- 470 12. X. Feng, N. Bansal, H. Yang, *Food Chem.*, **2016**, 200, 283–292.
- 471 13. H. Mohammadi, A. Kamkar, A. Misaghi, M. Zunabovic-Pichler, S. Fatehi, *Food*  
472 *Packaging Shelf*, **2019**, 21, 100330.
